# Supplementary material for: Measuring the size and density of nanoparticles by centrifugal sedimentation and flotation
Source: Royal Society of Chemistry journal article supplement (doi:10.1039/c8ay00237a), 2018-01-01
Supplement: c8ay00237a1.pdf [file c8ay00237a1.pdf]

## Supporting Information

### Measuring the size and density of nanoparticles by centrifugal sedimentation and flotation

*Caterina Minelli,\* Aneta Sikora, Raul Garcia-Diez, Katia Sparnacci, Christian Gollwitzer, Michael Krumrey and Alex G. Shard*

**Table S1.** Composition and yield of the PS nanoparticle samples.

| Sample | Styrene ml | SDS g | Yield % |
|--------|------------|-------|---------|
| PS600  | 70.0       | -     | 96.6    |
| PS300  | 70.0       | 0.1   | 98.1    |
| PS250  | 70.0       | 0.3   | 97.6    |
| PS200  | 50.0       | 0.3   | 96.9    |
| PS120  | 30.0       | 0.3   | 98.0    |

**Table S2.** Size (mode of the light extinction weighted size distribution) and density measurements by DCS in sedimentation, flotation and combined mode.

| Sample | Sedimentation |                               | Flotation   |                               | Combined  |                                |
|--------|---------------|-------------------------------|-------------|-------------------------------|-----------|--------------------------------|
|        | Size (nm)     | Density* (g/cm <sup>3</sup> ) | Size (nm)   | Density* (g/cm <sup>3</sup> ) | Size (nm) | Density** (g/cm <sup>3</sup> ) |
| PS600  | 552.0 ± 1.4   | 1.050                         | 588.3 ± 0.6 | 1.050                         | 576.4     | 1.047                          |
| PS300  | 302.7 ± 0.6   | 1.050                         | 296.0 ± 1.0 | 1.050                         | 298.6     | 1.051                          |
| PS250  | 236.7 ± 1.2   | 1.050                         | 235.0 ± 0.0 | 1.050                         | 235.9     | 1.050                          |
| PS200  | 188.7 ± 1.2   | 1.050                         | 188.3 ± 0.6 | 1.050                         | 188.4     | 1.050                          |
| PS120  | 115.7 ± 0.6   | 1.050                         | 115.0 ± 0.0 | 1.050                         | 115.2     | 1.050                          |

\* Assumed density, inputted in software

\*\* Measured density

**Table S3.** Widths of the size distributions as measured by DCS (light extinction weighted size distribution) in sedimentation and flotation modes, SEM and SAXS (Gaussian distribution model).

| Name  | DCS sedimentation PDI (%) | DCS flotation PDI (%) | SEM PDI (%) | SAXS PDI (%) |
|-------|---------------------------|-----------------------|-------------|--------------|
| PS120 | 7.2                       | 11.6                  | 9.7         | 10.9         |
| PS200 | 5.1                       | 9.6                   | 6.0         | 7.2          |
| PS250 | 3.8                       | 7.5                   | 3.8         | 4.2          |
| PS300 | 3.4                       | 4.1                   | 3.1         | n.m.         |
| PS600 | 3.8                       | 4.2                   | 3.2         | n.m.         |

The polydispersity index (PDI) for the DCS technique is defined as the ratio of the full width half maximum (FWHM) over the mode of the size distribution.

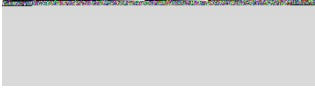

The polydispersity index (PDI) for the SEM technique is defined as the ratio of the full width half maximum (FWHM) over the mean of the size distribution. The FWHM is calculated as 2.355 times the standard deviation of the distribution, in the assumption the distribution is close to Gaussian.

The polydispersity index (PDI) of SAXS measurements is defined as the ratio of the FWHM of the Gaussian diameter distribution over the mean of the diameter distribution.
